# Supplementary material for: Brush macromolecules with thermo-sensitive coil backbones and pendant polypeptide side chains: synthesis, self-assembly and functionalization
Source: Royal Society of Chemistry journal article supplement (doi:10.1039/c4py01268b), 2014-11-19
Supplement: c4py01268b1.pdf [file c4py01268b1.pdf]

## Supporting Information

### Brush Macromolecules with Thermo-Sensitive Coil Backbones and Pendant Polypeptide Side Chains: Synthesis, Self-assembly and Functionalization

*Zheng Wei, Shuzhe Zhu and Hanying Zhao*

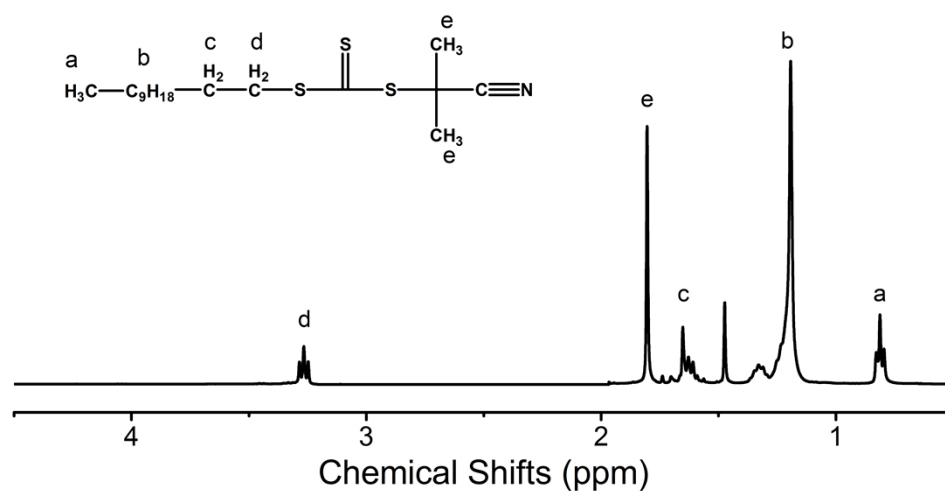

**Figure S1.**  $^1\text{H}$  NMR spectrum of RAFT agent 2-cyanopropan-2-yl decyl carbonotrithioate.

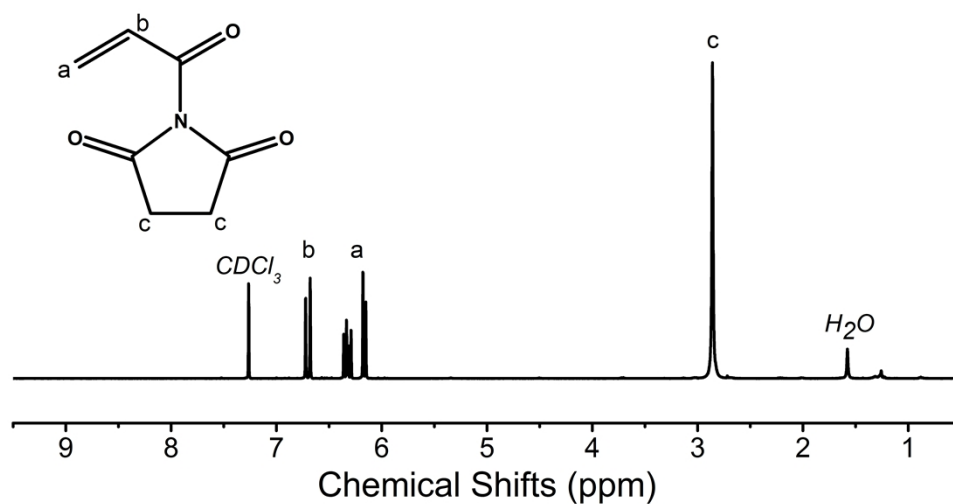

**Figure S2.** <sup>1</sup>H NMR spectrum of N-acryloxysuccinimide.

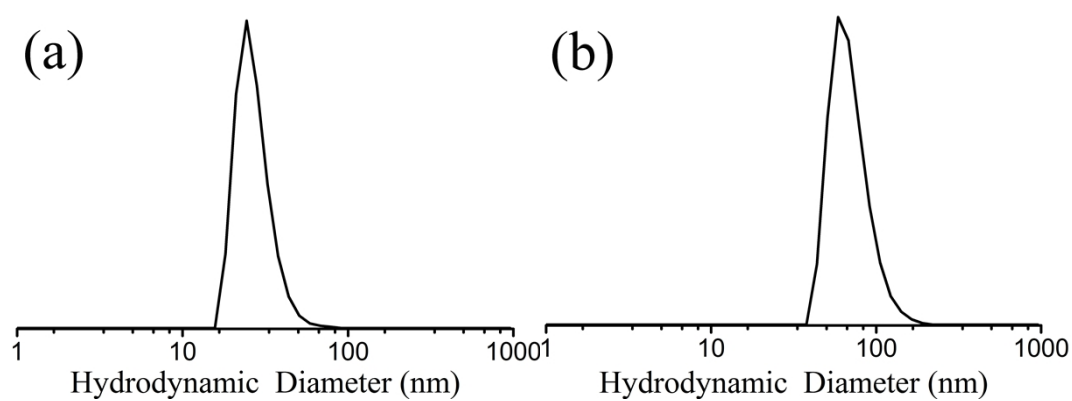

**Figure S3.** DLS curves of self-assembled aggregates formed by (a) poly(NIPAM<sub>55</sub>-co-NAS<sub>8</sub>)-g-PBLG<sub>10</sub> and (b) poly(NIPAM<sub>55</sub>-co-NAS<sub>8</sub>)-g-PBLG<sub>40</sub> in water.

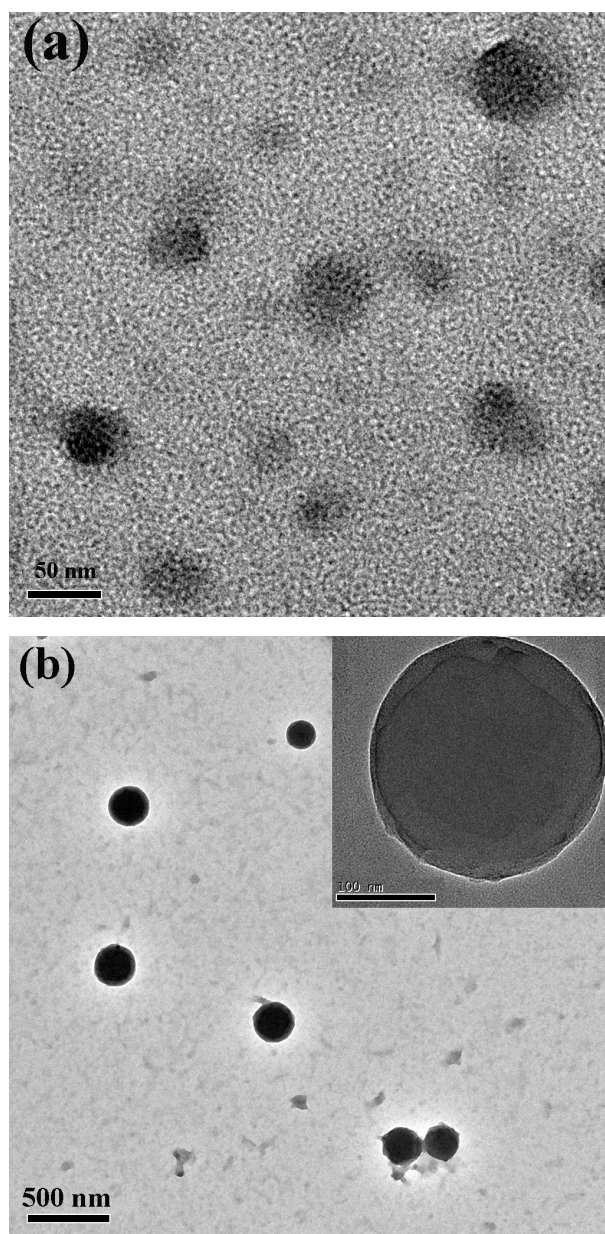

**Figure S4.** TEM images of self-assembled aggregates of (a) poly(NIPAM<sub>480</sub>-co-NAS<sub>60</sub>)-*graft*-PBLG<sub>10</sub> and (b) poly(NIPAM<sub>480</sub>-co-NAS<sub>60</sub>)-*graft*-PBLG<sub>20</sub> in water.

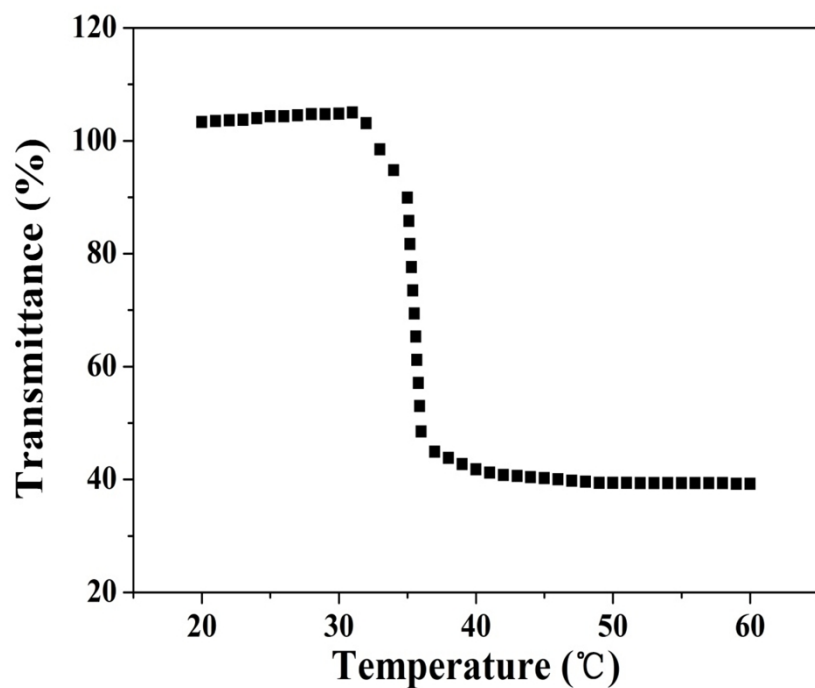

**Figure S5.** Transmittance change of aqueous solution of poly(NIPAM<sub>480</sub>-*co*-NAS<sub>60</sub>-NH-Boc) with temperature.

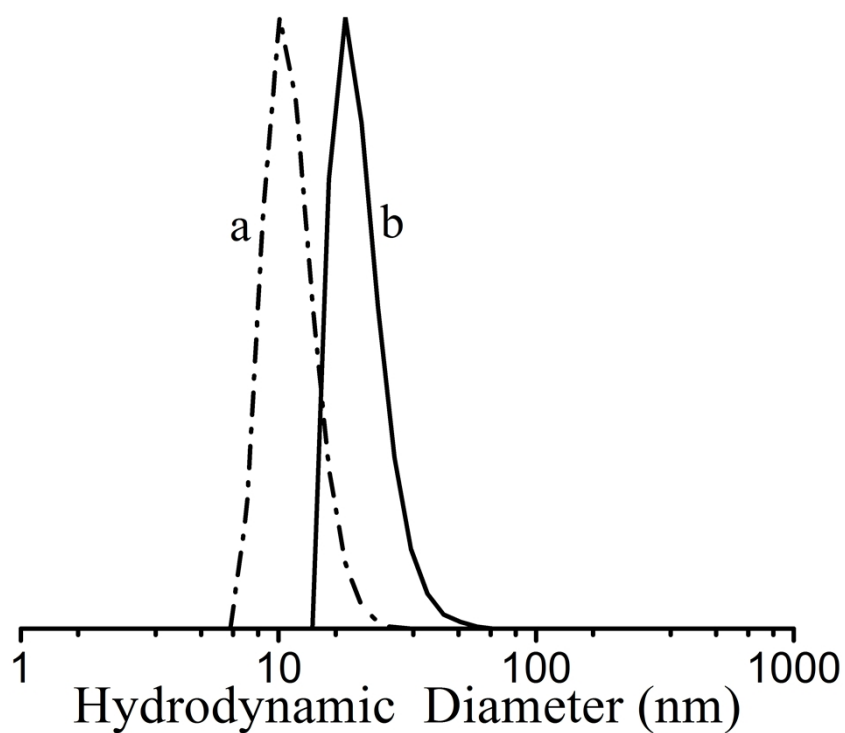

**Figure S6.** DLS curves of self-assembled aggregates formed by poly(NIPAM<sub>480</sub>-*co*-NAS<sub>60</sub>)-*graft*-PBLG<sub>10</sub> brush macromolecules at 25 (a) and 50 °C (b) in aqueous solution.

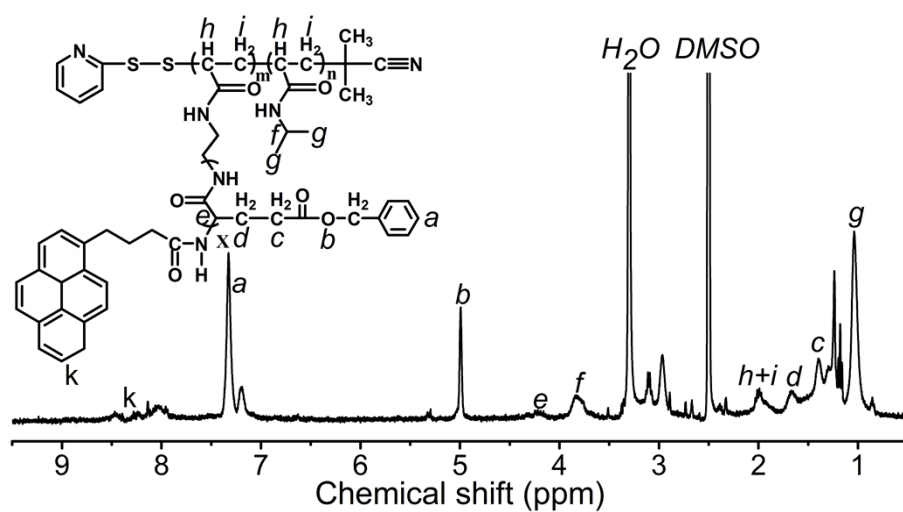

**Figure S7.**  $^1\text{H}$  NMR spectrum of the fluorescence-modified brush polymer,  $\text{py-poly}(\text{NIPAM}_{55}\text{-co-NAS}_8)\text{-g-PBLG}_{10}$ .
